# Supplementary material for: Properdistatin inhibits angiogenesis and improves vascular function in human melanoma xenografts with low thrombospondin-1 expression
Source: PubMed Central journal article supplement (PMC5363551; doi:10.18632/oncotarget.12695), 2016-10-15
Supplement: oncotarget-07-76806-s001.pdf [file oncotarget-07-76806-s001.pdf]

## Properdistatin inhibits angiogenesis and improves vascular function in human melanoma xenografts with low thrombospondin-1 expression

### Supplementary Materials

**Supplementary Movie S1: First pass imaging movies.** First-pass imaging movies of a representative untreated R-18 tumor (left) and a representative properdistatin-treated R-18 tumor (right). The movies illustrate how a bolus of 155 kD tetramethylrhodamine isothiocyanate-labeled dextran (TRITC-dextran) moves through the vascular network of the tumors. Tumor arterioles are supplied at similar time points in both tumors. However the capillary network is supplied more efficient in the properdistatin-treated tumor, and compared with the untreated tumor, the draining tumor venules are filled with TRITC-dextran earlier in the properdistatin-treated tumor. The movies last for 5.8 s and were recorded with a temporal resolution of 44.8 ms and a pixel size of  $7.5 \times 7.5 \mu\text{m}^2$ . Tumor area is delineated by a solid black line. Scale bar, 1 mm. The BST image and the corresponding BST frequency distribution of these tumors are shown in Figure 2A. See Supplementary\_Movie\_S1
